# Supplementary material for: Differential functional dysconnectivity of caudate nucleus subdivisions in Parkinson’s disease
Source: publisher site journal article supplement (doi:10.18632/aging.103628), 2020-07-19
Supplement: Supplementary file [file aging-v12i16-103628-supplementary-material-SD1.pdf]

## SUPPLEMENTARY FIGURE

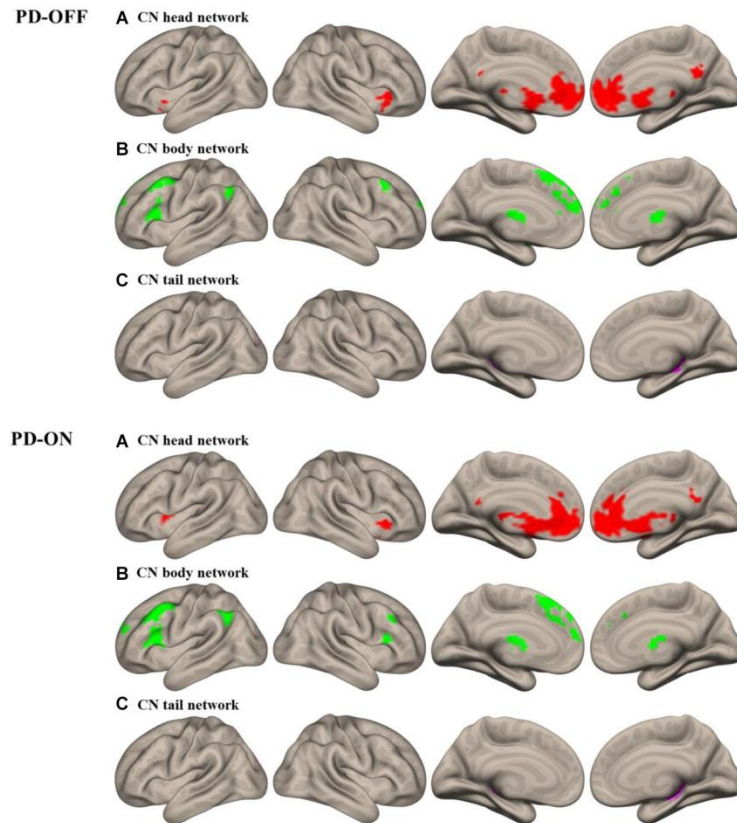

**Supplementary Figure 1. Intrinsic connectivity networks of caudate nucleus (CN) subdivisions in PD. (A)** CN head network; (B) CN body network; (C) CN tail network. Results were illustrated at uncorrected voxel-wise height threshold of  $p < 0.001$  combined with an FWE-corrected cluster-wise threshold of  $p < 0.001$ . Abbreviations: PD-OFF, PD OFF-medication; PD-ON, PD ON-medication.
