# Supplementary material for: Differential functional dysconnectivity of caudate nucleus subdivisions in Parkinson’s disease
Source: publisher site journal article supplement (doi:10.18632/aging.103628), 2020-07-19
Supplement: Supplementary file [file aging-v12i16-103628-supplementary-material-SD2.pdf]

## SUPPLEMENTARY TABLE

**Supplementary Table 1. Intrinsic connectivity networks of the whole caudate nucleus.**

| <b>Anatomical regions</b>       | <b>Cluster size (voxel)</b> | <b>MNI (x, y, z)</b> | <b>F-value</b> |
|---------------------------------|-----------------------------|----------------------|----------------|
| <b>HE</b>                       |                             |                      |                |
| Bi.MPFC/ACC/Frontal_Mid/CN/Thal | 6732                        | (9, 15, 0)           | 217.28         |
| Bi.PCu/PCC                      | 662                         | (-6, -42, 39)        | 14.80          |
| Lt.AG                           | 352                         | (-48, -78, 33)       | 10.38          |
| Rt.AG                           | 390                         | (54, -63, 36)        | 12.30          |
| Lt.Temporal_Mid                 | 165                         | (-66, -24, -9)       | 10.36          |
| <b>PD ON-medication</b>         |                             |                      |                |
| Bi.MPFC/ACC/Frontal_Mid/CN/Thal | 6882                        | (9, 12, 0)           | 336.00         |
| Lt.AG                           | 180                         | (-54, -51, 39)       | 9.02           |
| Lt.Temporal_Sup                 | 146                         | (-54, -18, 6)        | 15.31          |
| Rt.Temporal_Sup                 | 136                         | (60, 0, -3)          | 13.55          |
| <b>PD OFF-medication</b>        |                             |                      |                |
| Bi.MPFC/ACC/Frontal_Mid/CN/Thal | 6034                        | (12, 6, 12)          | 312.26         |
| Lt.Precentral                   | 276                         | (-39, 6, 51)         | 14.81          |
| Lt.AG                           | 112                         | (-54, -57, 36)       | 11.93          |
| Rt.Temporal_Sup                 | 169                         | (-51, -30, 12)       | 10.33          |

Note: Results were reported at an uncorrected voxel-wise height threshold of  $p < 0.001$  combined with an FWE-corrected cluster-wise threshold of  $p < 0001$ . Abbreviations:

CN, caudate nucleus; ACC, anterior cingulate cortex; MPFC, medial prefrontal cortex; PCu, precuneus; PCC, posterior cingulate cortex; Thal, thalamus; AG, angular gyrus; Mid, middle; Sup, superior; Bi, bilateral; Lt, left; Rt, right; HE, healthy elderly; PD, Parkinson's disease.
